# Supplementary material for: Serological diagnosis of fasciolosis (Fasciola hepatica) in humans, cattle, and sheep: a meta-analysis
Source: PubMed Central journal article supplement (PMC10509555; doi:10.3389/fvets.2023.1252454), 2023-08-31
Supplement: Data_Sheet_1.pdf [file Data_Sheet_1.pdf]

Chart 1: List of papers with each assessment of quality results by QUADAS criteria.

| Papers                        | Criteria |     |         |         |     |         |     |         | Score              |                 |           |
|-------------------------------|----------|-----|---------|---------|-----|---------|-----|---------|--------------------|-----------------|-----------|
|                               | 1        | 2   | 3       | 4       | 5   | 6       | 7   | 8       | Less to 4 criteria | 4 to 6 criteria | 7 or more |
| Cabán-Hernández et al 2013    | Yes      | Yes | No      | Yes     | Yes | Yes     | Yes | Unclear |                    | Good            |           |
| Carnevele et al 2001          | Yes      | Yes | Unclear | Yes     | Yes | Yes     | Yes | Unclear |                    | Good            |           |
| Cordova et al 1999            | Yes      | Yes | Unclear | Unclear | Yes | Yes     | Yes | Unclear |                    | Good            |           |
| Cornelissen et al 1992        | Yes      | Yes | Yes     | Yes     | Yes | Yes     | Yes | Unclear |                    |                 | Optimal   |
| Cornelissen et al 1999        | Yes      | Yes | Yes     | Yes     | Yes | Yes     | Yes | Unclear |                    |                 | Optimal   |
| Cornelissen et al 2001        | Yes      | Yes | Yes     | Yes     | Yes | Yes     | Yes | Unclear |                    |                 | Optimal   |
| El-Shazly et al 2002          | Yes      | Yes | Unclear | Yes     | Yes | Unclear | Yes | Unclear |                    | Good            |           |
| Espinoza et al 2005           | Yes      | Yes | Unclear | Unclear | Yes | No      | Yes | Unclear |                    | Good            |           |
| Espinoza et al 2007           | Yes      | Yes | Yes     | Yes     | Yes | Yes     | Yes | Unclear |                    |                 | Optimal   |
| Figueroa-Santiago et al 2011  | Yes      | Yes | Yes     | Yes     | Yes | Yes     | Yes | Unclear |                    |                 | Optimal   |
| Gottstein et al 2014          | Yes      | Yes | Unclear | No      | Yes | Yes     | Yes | Unclear |                    | Good            |           |
| Heidari et al 2015            | Yes      | Yes | Unclear | Yes     | Yes | Yes     | Yes | Unclear |                    | Good            |           |
| Hillyer et al 1996            | Yes      | Yes | Yes     | Yes     | Yes | Yes     | Yes | Unclear |                    |                 | Optimal   |
| Ikeda 1998                    | Yes      | Yes | Unclear | No      | Yes | Yes     | Yes | Unclear |                    | Good            |           |
| Kazantseva et al 2017         | Yes      | Yes | Unclear | Yes     | Yes | Yes     | Yes | Unclear |                    | Good            |           |
| Kooshan et al 2010            | Yes      | Yes | Yes     | No      | Yes | Yes     | Yes | Unclear |                    | Good            |           |
| Kuerpick et al 2013           | Yes      | Yes | Yes     | Unclear | Yes | Yes     | Yes | Yes     |                    |                 | Optimal   |
| Maher et al 1999              | Yes      | Yes | Yes     | Unclear | Yes | Yes     | Yes | Unclear |                    | Good            |           |
| Martinez-Sernandez et al 2018 | Yes      | Yes | Yes     | Yes     | Yes | Yes     | Yes | Unclear |                    |                 | Optimal   |
| Mezo et al 2003               | Yes      | Yes | Yes     | No      | Yes | Yes     | Yes | Unclear |                    | Good            |           |
| Mirzadeh et al 2018           | Yes      | Yes | Unclear | Yes     | Yes | Yes     | Yes | Unclear |                    | Good            |           |
| Mokhtarian et al 2018         | Yes      | Yes | Yes     | Yes     | Yes | Yes     | Yes | Unclear |                    |                 | Optimal   |
| Morales & Espino 2012         | Yes      | Yes | Yes     | Yes     | Yes | Yes     | Yes | Unclear |                    |                 | Optimal   |
| Mufti et al 2015              | Yes      | No  | Yes     | Yes     | Yes | Yes     | Yes | Unclear |                    | Good            |           |
| Rahini et al 2011             | Yes      | Yes | Yes     | Unclear | Yes | Yes     | Yes | Unclear |                    | Good            |           |
| Rokni et al 2002              | Yes      | Yes | Yes     | Unclear | Yes | Yes     | Yes | Unclear |                    | Good            |           |
| Salimi-bejestani et al 2005   | Yes      | Yes | Yes     | Yes     | Yes | Yes     | Yes | Unclear |                    |                 | Optimal   |
| Santana et al 2013            | Yes      | Yes | Unclear | Unclear | Yes | Yes     | Yes | No      |                    | Good            |           |
| Shafiei et al 2015            | Yes      | Yes | Yes     | Unclear | Yes | Yes     | Yes | Unclear |                    | Good            |           |
| Simsek et al 2006             | Yes      | Yes | Yes     | Unclear | Yes | Yes     | Yes | Unclear |                    | Good            |           |
| Aguayo et al 2018*            | Yes      | Yes | Yes     | Yes     | Yes | Yes     | Yes | Unclear |                    |                 | Optimal   |

|                      |     |     |         |         |         |    |     |         |         |      |
|----------------------|-----|-----|---------|---------|---------|----|-----|---------|---------|------|
| Cornejo et al 2010*  | Yes | Yes | Yes     | Yes     | Yes     | No | Yes | Unclear |         | Good |
| Mirzadeh et al 2017* | Yes | Yes | Unclear | Unclear | Unclear | No | Yes | Unclear | Regular |      |

---

\*Pubmed database.

Chart 2: List of papers with each assessment of quality results by STARD criteria.

| Paper                         | Criteria |     |     | Score         |           |
|-------------------------------|----------|-----|-----|---------------|-----------|
|                               | 1        | 2   | 3   | To 2 criteria | More to 3 |
| Cabán-Hernández et al 2013    | Yes      | Yes | No  | Regular       |           |
| Carnevele et al 2001          | Yes      | No  | No  | Regular       |           |
| Cordova et al 1999            | Yes      | No  | No  | Regular       |           |
| Cornelissen et al 1992        | Yes      | No  | Yes | Regular       |           |
| Cornelissen et al 1999        | Yes      | No  | Yes | Regular       |           |
| Cornelissen et al 2001        | Yes      | No  | Yes | Regular       |           |
| El-Shazly et al 2002          | Yes      | No  | Yes | Regular       |           |
| Espinoza et al 2005           | Yes      | No  | No  | Regular       |           |
| Espinoza et al 2007           | Yes      | No  | Yes | Regular       |           |
| Figueroa-Santiago et al 2011  | Yes      | No  | No  | Regular       |           |
| Gottstein et al 2014          | Yes      | No  | No  | Regular       |           |
| Heidari et al 2015            | Yes      | No  | No  | Regular       |           |
| Hillyer et al 1996            | Yes      | No  | No  | Regular       |           |
| Ikeda 1998                    | Yes      | No  | No  | Regular       |           |
| Kazantseva et al 2017         | Yes      | Yes | No  | Regular       |           |
| Kooshan et al 2010            | Yes      | No  | No  | Regular       |           |
| Kuerpick et al 2013           | Yes      | Yes | Yes |               | Optimal   |
| Maher et al 1999              | Yes      | No  | Yes | Regular       |           |
| Martinez-Sernandez et al 2018 | Yes      | No  | Yes | Regular       |           |
| Mezo et al 2003               | Yes      | No  | Yes | Regular       |           |
| Mirzadeh et al 2018           | Yes      | No  | No  | Regular       |           |
| Mokhtarian et al 2018         | Yes      | No  | No  | Regular       |           |
| Morales & Espino 2012         | Yes      | No  | No  | Regular       |           |
| Mufti et al 2015              | Yes      | No  | Yes | Regular       |           |
| Rahimi et al 2011             | Yes      | No  | No  | Regular       |           |
| Rokni et al 2002              | Yes      | No  | Yes | Regular       |           |
| Salimi-bejestani et al 2005   | Yes      | Yes | Yes |               | Optimal   |
| Santana et al 2013            | Yes      | No  | Yes | Regular       |           |
| Shafiei et al 2015            | Yes      | Yes | No  | Regular       |           |
| Simsek et al 2006             | Yes      | No  | No  | Regular       |           |
| Aguayo et al 2018*            | Yes      | No  | No  | Regular       |           |

Cornejo et al 2010\*  
Mirzadeh et al 2017\*

|     |     |    |         |
|-----|-----|----|---------|
| Yes | Yes | No | Regular |
| Yes | No  | No | Regular |

---

\* Pubmed database

Chart 3. Characteristics of studies analyzed in meta-analysis

| Author                       | Specie           | Participant Characteristics          | Clinical Setting | Study Design               | Target Condition Definition                                                 | Index Test | Reference Standard                                   | Sample Size                                                                                                        | Funding Sources |
|------------------------------|------------------|--------------------------------------|------------------|----------------------------|-----------------------------------------------------------------------------|------------|------------------------------------------------------|--------------------------------------------------------------------------------------------------------------------|-----------------|
| Carnevale et al 2001         | Human            | Naturally infection                  | Not clear        | Validation diagnostic test | Secretary/excretory antigens                                                | ELISA      | Coprological                                         | 341 samples (22 positive, 100 negative, and 219 other parasites)                                                   | No Mentioned    |
| Cordova et al 1999           | Human            | Naturally infection                  | Not clear        | Validation diagnostic test | Secretary/excretory antigens                                                | ELISA      | Coprological and imunoelctroforese                   | 138 samples (38 positive, 46 negative and 54 other parasites)                                                      | No Mentioned    |
| Cornelissen et al 1999       | Bovine           | Naturally and experimental infection | Farm             | Validation diagnostic test | Secretary/excretory antigens                                                | ELISA      | Coprological and macroscopic inspection of the liver | 421 samples (95 positive, 183 other parasites and negative)                                                        | No Mentioned    |
| Cornelissen et al 2001       | Ovine and bovine | Naturally and experimental infection | Farm             | Validation diagnostic test | Recombinant cathepsin                                                       | ELISA      | Coprological                                         | 204 ovine (31 positive and 119 other parasites) and 568 bovine (106 positive and 332 other parasites) and negative | No Mentioned    |
| Espinoza et al 2005          | Human            | Naturally infection                  | Not clear        | Validation diagnostic test | Secretary/excretory antigens                                                | ELISA      | Coprological                                         | 138 samples (38 positive, 46 negative and 54 other parasites)                                                      | Yes             |
| Espinoza et al 2007          | Human            | Naturally infection                  | Not clear        | Validation diagnostic test | Secretary/excretory antigens                                                | ELISA      | Coprological                                         | 634 feces and 613 serum (46 negative and other parasites by stool examination)                                     | Yes             |
| Figueroa-Santiago et al 2011 | Human            | Naturally infection                  | Sample bank      | Validation diagnostic test | Secretary/excretory antigens                                                | ELISA      | Coprological                                         | 127 samples (37 positive, 50 negative and 40 other parasites)                                                      | Yes             |
| Gottstein et al 2014         | Human            | Naturally infection                  | Not clear        | Validation diagnostic test | Secretary/excretory antigens, recombinant saposin and recombinant cathepsin | ELISA      | Coprological                                         | 257 samples (30 positive, 20 negative, 87 other parasites and 121 cancer)                                          | No Mentioned    |
| Heidari et al 2015           | Ovine            | Experimental infection               | Abattoir         | Validation diagnostic test | Secretary/excretory antigens                                                | ELISA      | Coprological and macroscopic inspection of the liver | 281 samples (50 positive, 150 negative and 81 other parasites)                                                     | No              |

|                               |                  |                                      |           |                            |                                                                                                                                       |       |                                                                   |                                                                   |              |
|-------------------------------|------------------|--------------------------------------|-----------|----------------------------|---------------------------------------------------------------------------------------------------------------------------------------|-------|-------------------------------------------------------------------|-------------------------------------------------------------------|--------------|
| Hillyer et al 1996            | Ovine and bovine | Naturally and experimental infection | Farm      | Validation diagnostic test | Secretory/excretory antigens                                                                                                          | ELISA | Coprological                                                      | 184 ovine (22 positive) and 147 bovine (38 positive) and negative | Yes          |
| Kooshan et al 2010            | Ovine            | Naturally infection                  | Abattoir  | Validation diagnostic test | Secretory/excretory antigens and Somatic antigen                                                                                      | ELISA | Coprological and macroscopic inspection of the liver              | 140 samples (30 positive, 10 negative and 100 for validation)     | Yes          |
| Kuerpick et al 2013           | Bovine           | Experimental infection               | Farm      | Validation diagnostic test | Secretory/excretory antigens and recombinant cathepsin                                                                                | ELISA | Coprological and Sorological                                      | 140 samples (20 positive, 100 negative and 20 other parasites)    | Yes          |
| Maher et al 1999              | Human            | Naturally infection                  | Hospital  | Validation diagnostic test | Somatic antigen                                                                                                                       | ELISA | Coprological                                                      | 176 samples (60 positive, 20 negative and 96 other parasites)     | No Mentioned |
| Martinez-Sernandez et al 2018 | Ovine and bovine | Naturally infection                  | Abattoir  | Validation diagnostic test | Recombinant cathepsin                                                                                                                 | ELISA | Coprological and Sorological                                      | 300 samples (100 positive, 200 negative and other parasites)      | Yes          |
| Mezo et al 2003               | Ovine            | Naturally infection                  | Abattoir  | Validation diagnostic test | Secretory/excretory antigens                                                                                                          | ELISA | Coprological and macroscopic inspection of the liver              | 142 samples (46 positive, 50 negative and 46 other parasites)     | Yes          |
| Mokhtarian et al 2018         | Ovine            | Naturally infection                  | Abattoir  | Validation diagnostic test | Secretory/excretory antigens, recombinant fatty acid binding protein, recombinant glutathione S-transferase and recombinant cathepsin | ELISA | Coprological and macroscopic inspection of the liver              | 113 samples (30 positive, 40 negative and 43 other parasites)     | Yes          |
| Morales & Espino 2012         | Human            | Naturally infection                  | Hospital  | Validation diagnostic test | Secretory/excretory antigens                                                                                                          | ELISA | Coprological                                                      | 119 samples (45 positive, 33 negative and 41 other parasites)     | Yes          |
| Mufti et al 2015              | Bovine           | Experimental infection               | Farm      | Validation diagnostic test | Secretory/excretory antigens                                                                                                          | ELISA | Coprological                                                      | 200 samples                                                       | No Mentioned |
| Rahimi et al 2011             | Human            | Naturally infection                  | Not clear | Validation diagnostic test | Somatic antigen                                                                                                                       | ELISA | Coprological ELISA, Immunofluorescence and surgical confirmations | 84 samples (35 positive, 22 negative and 27 other parasites)      | Yes          |

|                             |        |                        |           |                            |                              |       |                                                      |                                                                    |              |
|-----------------------------|--------|------------------------|-----------|----------------------------|------------------------------|-------|------------------------------------------------------|--------------------------------------------------------------------|--------------|
| Rokni et al 2002            | Human  | Naturally infection    | Not clear | Validation diagnostic test | Secretary/excretory antigens | ELISA | Coprological                                         | 268 samples (176 positive, 15 negative and 77 other parasites)     | No Mentioned |
| Salimi-bejestani et al 2005 | Bovine | Experimental infection | Farm      | Validation diagnostic test | Secretary/excretory antigens | ELISA | Coprological                                         | 526 samples (264 positive, 256 negative and 6 other parasites)     | No Mentioned |
| Santana et al 2013          | Human  | Naturally infection    | Hospital  | Validation diagnostic test | Recombinant cathepsin        | ELISA | Coprological                                         | 386 samples (93 positive and 135 negative and 158 other parasites) | Yes          |
| Shafiei et al 2015          | Human  | Naturally infection    | Not clear | Validation diagnostic test | Somatic antigen              | ELISA | Coprological                                         | 77 samples (15 positive and 30 negative and 32 other parasites)    | Yes          |
| Simsek et al 2006           | Bovine | Naturally infection    | Farm      | Validation diagnostic test | Secretary/excretory antigens | ELISA | Coprological and macroscopic inspection of the liver | 1200 samples                                                       | No Mentioned |
| Aguayo et al 2018           | Human  | Naturally infection    | Not clear | Validation diagnostic test | Secretary/excretory antigens | ELISA | Coprological                                         | 116 samples (36 positive, 36 negative and 44 other parasites)      | Yes          |
| Cornejo et al 2010          | Human  | Naturally infection    | Not clear | Validation diagnostic test | Secretary/excretory antigens | ELISA | Coprological                                         | 298 samples (33 positive, 177 negative and 88 other parasites)     | Yes          |
| Mirzadeh et al 2017         | Human  | Naturally infection    | Not clear | Validation diagnostic test | Secretary/excretory antigens | ELISA | Coprological                                         | 201 samples (52 positive, 70 negative and 79 other parasites)      | Yes          |

---
